# Supplementary material for: Embryonic desiccation resistance in Aedes aegypti: presumptive role of the chitinized Serosal Cuticle
Source: PubMed Central journal article supplement (PMC2561029; doi:10.1186/1471-213x-8-82), 2008-09-13
Supplement: 1471-213X-8-82-S2.pdf [file 1471-213X-8-82-S2.pdf]

|        |                                                                    |                                                          |
|--------|--------------------------------------------------------------------|----------------------------------------------------------|
|        | 1                                                                  | 47                                                       |
| AaCHS1 | MSAIRHRPLATQ-----NESDDNFTDDESTPLTQDIYGGSQRTVQETKGWDV               |                                                          |
| AgCHS1 | MSAIRHRPLANGP-----NESDDNFSDDDESTPLTHDIYGGSQRTVQETKGWDV             |                                                          |
| Dm_kkv | MSAMRHRPMAPPQGPGAGTAGEHVSDDDNNFTDDESSPLTHDIYGGSQRTIQETKGWDV        |                                                          |
|        | ***:****:*                                                         | :..*:*:*:*:*:*:*:*:*:*:*:*:*:*:*:*:*:*:*:*:*:*:*:*:*:*:* |
|        | 48                                                                 | 107                                                      |
| AaCHS1 | FRDPPIKEDTGSMADQACLELTIKILKIFAYLLTFVIVLTGGVVAKGCVLFMSSQLKRDR       |                                                          |
| AgCHS1 | FRDPPIKEDTGSMADQACLDLTIKILKIFAYLITFVIVLLGGVVAKGCVLFMSSQLRRDR       |                                                          |
| Dm_kkv | FRDPPIKIETGSTANQECELELTVKILKIFAYVITFIIIVLTGGVIAKGTMLFMTSQVRKDK     |                                                          |
|        | ***** :*** *:* **:*:*:*:*:*:*:*:*:*:*:*:*:*:*:*:*:*:*:*:*:*:       |                                                          |
|        | 108                                                                | 167                                                      |
| AaCHS1 | KITYCNRDLARDKQFVATLPEEERIAWMWALMIAFAVPEIGTFIRSTRICFFKSMKKPFK       |                                                          |
| AgCHS1 | KITYCNRDLARDKSFIVSLPEEERIAWMWALMIAFAVPEIGTFIRSTRICFFKSMKKPLK       |                                                          |
| Dm_kkv | KMEYCNDLGRDKSFVVRLEPEERVAVIWIALLIAYALPEIGALIRSARICFFKTFKVPKT       |                                                          |
|        | *: ***:*.*.*.*.*.*.*.*.*.*.*.*.*.*.*.*.*.*.*.*.*.*.*.*.*.*.*       |                                                          |
|        | 168                                                                | 227                                                      |
| AaCHS1 | SHFLLVFLMESFHTIGLVLLFFVVLPEVDSVKGAMLTNCLCVIPGLLGMFSRTNKEGKRA       |                                                          |
| AgCHS1 | SHFLLVFLMESFHTIGLVLLFFVVLPEVDSVKGAMLTNCLCVIPGMLGLFSRTNKEGKRA       |                                                          |
| Dm_kkv | GHFLFVWLMESLSAVGMALLMFVVLQIDAIQGAMLTNCLCVVPGIFGLLSRTSKEGKRF        |                                                          |
|        | .***:*:*:*:*:*: :*:*:*:*:*:*:*:*:*:*:*:*:*:*:*:*:*:*:*:*.*.*.*.*.* |                                                          |
|        | 228                                                                | 287                                                      |
| AaCHS1 | VKSIVDLAAIAAQITGFVWPLLENRPVLWLI PVSALLTSCGWWENYVSPQSPFGFIRAM       |                                                          |
| AgCHS1 | VKSIVDLAAIAAQITGFIVWPLLENRPVLWLI PVSALLTSCGWWENYVSPQSPFSFVRSL      |                                                          |
| Dm_kkv | VKVIIDLAAVAQVTGLVIWPLLENRRELWVIPVACVMISCGWWENYVSPQSPLGLVRAL        |                                                          |
|        | ** *:***:*:*:*:*:*:*:*:*:*:*:*:*:*:*:*:*:*:*:*:*:*:*:*:*:*:*       |                                                          |
|        | 288                                                                | 347                                                      |
| AaCHS1 | GRVKEDLKQTRYFTYMFLSLWKVMLFFCIVLVIMFFNGDEVANLFSLFGVGFPHKIVVE        |                                                          |
| AgCHS1 | GRVKEDLKQTRYFTYMFLSVWKILLFCFVSVILFVRGDEVANLFSLFGAGYGFPHKIVVE       |                                                          |
| Dm_kkv | GRIKEEMKYTRYFCHIFLSIWKILLFFTVTLLIYWAQGEEPGNLFAMYGDAFGPHKIVY        |                                                          |
|        | *:*:*:*:* *.*.*.*.*.*.*.*.*.*.*.*.*.*.*.*.*.*.*.*.*.*.*.*.*.*.*    |                                                          |
|        | 348                                                                | 407                                                      |
| AaCHS1 | EVATAFSSALPDLVEASQAGDTVVIDASYNTVTVYVLI IQILGAYLCYVFGKFACKILIQG     |                                                          |
| AgCHS1 | EVALPFSSALPDLVEAAQAVDTIDIDAAYNTVTVYVLI IQILAAYLCYIFGKFACKILIQG     |                                                          |
| Dm_kkv | ELPAGLGGVLPDTLESAN-IDTVDVDAAYNTVVYVLLLIQIFGAYLCYIFGKFACKILIQG      |                                                          |
|        | *:.. :...*** :*:*:*:*:*:*:*:*:*:*:*:*:*:*:*:*:*:*:*:*:*:*:*:*      |                                                          |
|        | 408                                                                | 467                                                      |
| AaCHS1 | FSYAFPVNLTIPVAISLLIAACGIRNDDPCFFHGSIPDYLFFESPPVFRLSDFASRQMAW       |                                                          |
| AgCHS1 | FSYAFPVNLTVPVAISLLIAACGIRNDDPCFFHGSIPDYLFFESPPVFRLNDFASRQMAW       |                                                          |
| Dm_kkv | FSYAFPVSLTVPLSVTFLIAACGIRIDDPFFHDTIPDYLFFTSNFRFNNFVTEQMAW          |                                                          |
|        | *****.*:*:*:*:*:*:*:*:*:*:*:*:*:*:*:*:*:*:*:*:*:*:*:*.*.*.*.*      |                                                          |
|        | 468                                                                | 527                                                      |
| AaCHS1 | AWLLWLLSQTWITLHIWTPKCERLANTEKLFVTPMYNALLIDQSMALNRRRDDQADVKTE       |                                                          |
| AgCHS1 | AWLLWLLSQTWITLHIWTPKCERLANTEKLFVTPMYSALLIDQSMAMNRRRDDQADVKTE       |                                                          |
| Dm_kkv | AWILWLLSQTWIALHIWTPKCERLATTEKLFVQPMYSSLLIDQSMALNRRRDDQADVKTE       |                                                          |
|        | *:*:*:*:*:*:*:*:*:*:*:*.*.*.*.*.*.*.*.*.*.*.*.*.*.*.*.*.*.*.*.*    |                                                          |
|        | 528                                                                | 586                                                      |
| AaCHS1 | DLAEIEKEKGDEYYETISVHTDGSALP-RPSVKSSDHITRIYACATLWHETKEEMIVFLK       |                                                          |
| AgCHS1 | DLAEIEKEKGDEYYETISVHTDGSALP-RPSVKSSDHITRIYACATLWHETKEEMMVFLK       |                                                          |
| Dm_kkv | DLSEIEKEKGDEYYETISVHTDRSSAPNKPSIKSSDNITRIYSCATMWHETKDEMIEFLK       |                                                          |
|        | *:*:*:*:*:*:*:*:*:*:*:*:*:*:*:*:*:*:*:*:*:*:*:*.*:*:*:*:*:*:*:*    |                                                          |



```

1183                                     1241
AaCHS1 -SVAEDSEEEDEQSDSETSTLQRNERDFLTNPYWIEDPDLKKGEVDFISSTEIQFWKDLI
AgCHS1 -SVAEDTEDDDEDEDSETSTLQORDERDFLTNPYWIEDPDLKKGEVDFISSTEIQFWKDLI
Dm_kkv TSVAEKSGDESDESDDTSAEPKQERDFLTNPYWIEDPDVRKGEVDFLSSTEIQFWKDLI
      ****.: :.:.:.*:.*: :.:*****:*****:*****
1242                                     1302
AaCHS1 DQYLYPIDQNKEEQARIAHDLKELRDSSVFGFIMINALFVLIVFLLQLNKDNIHVKWPLG
AgCHS1 DKYLYPIDQNKEEQARIAVDLKELRNKSVFAFFMFNALFVLIVFLLQLNKDKLHIIWPLG
Dm_kkv DQYLYPIDNDPVEQARIAKDLKELRDSSVFAFFMINALFVLIVFLLQLNKDNIHVKWPFQ
      *:*****.: ***** *****:.*.*:.*:*****:*****:.*:.*
1303                                     1362
AaCHS1 VKTNITYDEATQEVHISKEYLQLEPIGLVFVFFFALILIIQFTAMLFHRFGTLSHILAST
AgCHS1 VKTNITYDEVTAEVHISKEYLQLEPIGLVFVFFFALILIIQFVAMMFHRFGTLSHILAST
Dm_kkv VRTNITYDESTQEVHISKEYLQLEPIGLVFVFFFALILIIQFTAMLFHRFGTISHILAST
      *:***** * **********.*****:*****:*****
1363                                     1422
AaCHS1 ELNWGCNKKPEELSQDALIDKHAVEIVKNLQRLQIGDGDYDNDSGSGPDRIARRRTIQNL
AgCHS1 ELNWACNKKPEELSQDALIDKHAVEIVKNLQRLQIGDGDYDNDSGSGPDRIARRRTIQNL
Dm_kkv ELNF-CKKSEDLTQDQLIDKHAVEIVKNLQRLQIGDGDYDNDSGSGPDRIARRKTIQNL
      ***: *:*.*:.*:.* **********:*****
1423                                     1481
AaCHS1 EKARQPRRQIGTLDVAFKKRFLKLTAD-ENNAGTPILTRRMTMRRETIRALEVRKNSVMA
AgCHS1 EKARQPRRQIGTLDVAFKKRFLKLTAD-ENNTATPILTRRMTMRRETIRALEVRKNSVMA
Dm_kkv EKARQPRRQIGTLDVAFKKRFLKLTADAENNPATPILTRRLTMRAETIRALEVRKNSVMA
      ********** *.*.*****:*** **********
1482                                     1538
AaCHS1 ERRKSQMOTLGANNEYGIT-GVNNTNNNAPQ--RPLRTSNAGVSVKIDIFNVNGGPGGDIY
AgCHS1 ERRKSQMOTLGANNEYGIT-GVPNGNNAPP--RPTRTSNAGVSVKIDIFNVNGGPGGEIY
Dm_kkv ERRKSAMOTLGAKNEYGITGAPINNGALPNQRSGRVSNAGISIKDVFNVNGGGAEQIY
      *****:***** *. **.* *.*.*****:.*:***** .:.*
1539                                     1576
AaCHS1 GVTG--QVNQAYEPVIEDD-DRNSLRLQPRN-----QVTWSNS-NGRL-----
AgCHS1 GVTG--QVNQAYEPVIEDD-DRNSLRLQPRN-----QVTWGNNGNARL-----
Dm_kkv GSNGGGTINQGYEHVIDEDGDGNSLRLTTRNPHPHPHQVSWGQNTNGGGGNGTGRL
      * .* :*.** *:.* * ***** .* **:*.*. *

```

**Additional Figure 2: Alignment of predicted protein sequences of Dipteran CHS1 sequence.** Alignment of predicted Chitin Synthase 1 (CHS-A) amino acid sequence of *Ae. aegypti* (AaCHS1), *An. gambiae* (AgCHS1) and *D. melanogaster kkv* using ClustalW software. ▼ indicates the position of the first intron (28,587 bp) in the *AaCHS1* coding sequence. The region highlighted in gray corresponds to AaCHS1 exon 6a (see Fig. 5). Symbols below the aligned amino acid sequences indicate identical (\*), highly conserved (:), and conserved (.) residues.
