# Supplementary material for: Embryonic desiccation resistance in Aedes aegypti: presumptive role of the chitinized Serosal Cuticle
Source: PubMed Central journal article supplement (PMC2561029; doi:10.1186/1471-213x-8-82), 2008-09-13
Supplement: 1471-213X-8-82-S3.pdf [file 1471-213X-8-82-S3.pdf]

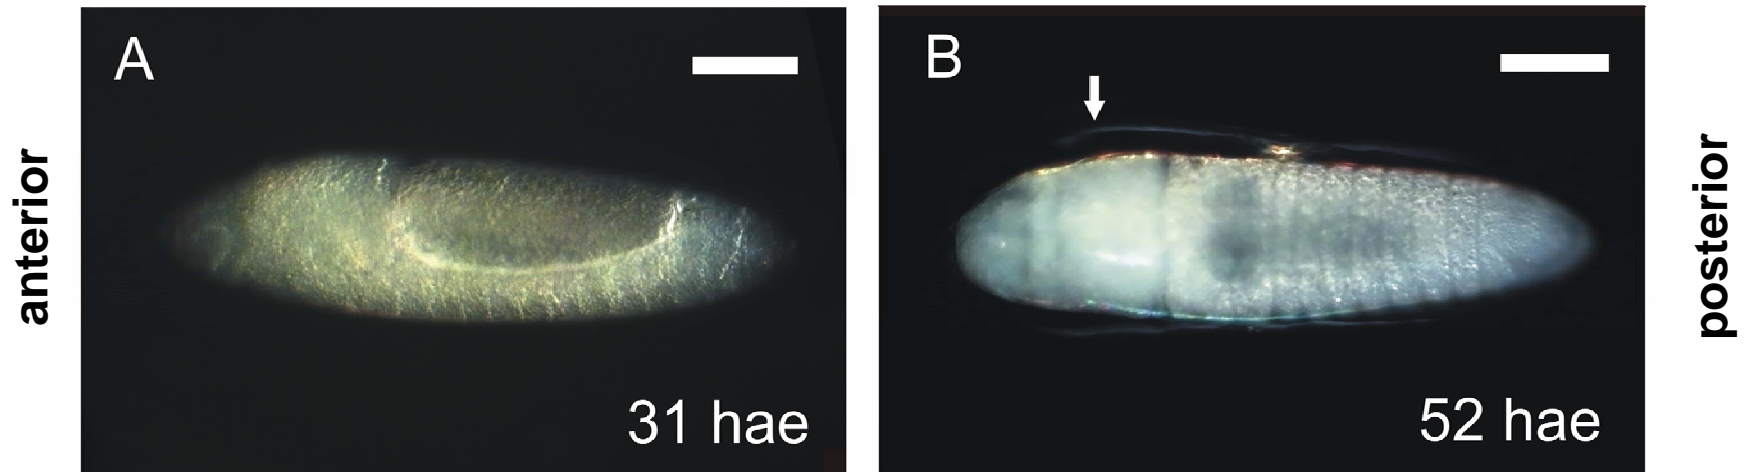

**Additional Figure 3: Embryo morphology at late embryogenesis.** (A) 31-HAE embryo at dorsal closure, lateral view. The plane of focus is inside the embryo, and thus the endochorion is not visible (B) 52-HAE embryo showing head, thoracic and abdominal segments, dorsal view. White arrow: endochorion. Bar = 100  $\mu$ m
